# Supplementary material for: The Effects of Glucose Therapy Agents—Apple Juice, Orange Juice, and Cola—on Enteral Tube Flow and Patency
Source: Atypon-hosted journal article supplement (doi:10.3148/cjdpr-2015-049), 2016-02-26
Supplement: cjdpr-2015-049suppl.pdf [file cjdpr-2015-049suppl.pdf]

**Supplementary Figure 1 - Hypoglycemia Protocol at Sunnybrook Health Sciences Centre**

**HYPOGLYCEMIA – Detection, Treatment, Follow-up, and Prevention**

**1. Detection:**

- Blood glucose (BG) test result 3.9 mmol/L or less (bedside or lab value).
- Demonstrated signs and symptoms (see table) followed by confirmatory blood glucose test.

| <i>Mild</i>                                                                                            | <b>Moderate</b>                                                                                                                                         | <b>Severe</b>              |
|--------------------------------------------------------------------------------------------------------|---------------------------------------------------------------------------------------------------------------------------------------------------------|----------------------------|
| BG 3-4 mmol/L                                                                                          | BG 2.9 mmol/L or less                                                                                                                                   | BG 1.9 mmol/L or less      |
| Trembling<br>Palpitations<br>Sweating, pallor<br>Anxiety,<br>nervousness<br>Hunger, nausea<br>Headache | Confusion<br>Difficulty concentrating or speaking<br>Tiredness, weakness<br>Dizziness, lack of coordination<br>Anger or odd behaviour<br>Vision changes | Stupor<br>Seizures<br>Coma |

**2. Treatment:**

**Goal:** to raise blood glucose to 4.0 mmol/L or greater and to maintain blood glucose above 4.0 mmol/L.

**Treatment:** 15-20 g of glucose (dextrose) or source of rapidly absorbed carbohydrate.

**Specific Treatment Modality:** This must be individualized based – see table for options.

| Patient Attribute                                                                                                                               | Treatment for Hypoglycemia                                                                                                                                                                                                                                                                         |
|-------------------------------------------------------------------------------------------------------------------------------------------------|----------------------------------------------------------------------------------------------------------------------------------------------------------------------------------------------------------------------------------------------------------------------------------------------------|
| <ul style="list-style-type: none"> <li>• <b><u>Can</u> chew tablets</b></li> </ul>                                                              | <ul style="list-style-type: none"> <li>• Glucose (dextrose) tablets – 4 g each</li> <li>• Patient to chew 4 tablets, then swallow with water (available in Hypoglycemia Kit)</li> </ul>                                                                                                            |
| <ul style="list-style-type: none"> <li>• <b><u>Cannot</u> chew tablets</b></li> <li>• <b><u>Can</u> swallow liquids</b></li> </ul>              | <ul style="list-style-type: none"> <li>• Fruit juice – apple preferred; orange acceptable</li> <li>• 2 mini-cartons or 2 Dixie Cups (approx. 200 mL)</li> </ul>                                                                                                                                    |
| <ul style="list-style-type: none"> <li>• <b>Dysphagic</b><br/><b>(requires thickened liquids)</b></li> </ul>                                    | <ul style="list-style-type: none"> <li>• Glucose gel (Insta-Glucose)<br/>Contents of 1 tube (24 g glucose) squeezed into mouth and swallowed (available in Hypoglycemia Kit)</li> </ul>                                                                                                            |
| <ul style="list-style-type: none"> <li>• <b>Enteral Feeding Tube</b></li> </ul>                                                                 | <ul style="list-style-type: none"> <li>• Fruit juice – apple preferred; orange acceptable</li> <li>• 2 mini-cartons or 2 Dixie Cups (approx. 200 mL)</li> <li>• Flush tube before and after juice with 30 mL of water to reduce risk of clogging due to interaction of juice with feeds</li> </ul> |
| <p>If blood glucose is <b>3.4 mmol/L or less on two consecutive tests (over 10 minutes)</b>, follow table below according to patient needs.</p> |                                                                                                                                                                                                                                                                                                    |
| <ul style="list-style-type: none"> <li>• <b>NPO</b></li> <li>• <b>No Enteral Feeding Tube</b></li> <li>• <b><u>No IV Access</u></b></li> </ul>  | <ul style="list-style-type: none"> <li>• Glucagon injection 1 mg (1 unit) subcutaneously</li> <li>• Check MAR for a PRN order for SC glucagon. If none, contact physician to request phone order.</li> </ul>                                                                                       |

|                                                                                                                                             |                                                                                                                                                                                                                                                                                                                                                                                                                                                                         |
|---------------------------------------------------------------------------------------------------------------------------------------------|-------------------------------------------------------------------------------------------------------------------------------------------------------------------------------------------------------------------------------------------------------------------------------------------------------------------------------------------------------------------------------------------------------------------------------------------------------------------------|
| <ul style="list-style-type: none"> <li>• <b>NPO</b></li> <li>• <b>No Enteral Feeding Tube</b></li> <li>• <b><u>IV Access</u></b></li> </ul> | <ul style="list-style-type: none"> <li>• Check MAR for a PRN order for IV dextrose. If none, contact physician to request phone order.</li> <li>• IV dextrose 12.5 g to 25 g given by either of these methods:<br/><br/>Hang a bag of D10W (dextrose 10%) and infuse 125 to 250 mL as fast as possible (over 5-10 min).<br/><br/><b>OR</b><br/><br/>Using a pre-filled syringe of dextrose 50%, add 25-50 mL to 100 mL minibag of D5W and infuse over 5 min.</li> </ul> |
|---------------------------------------------------------------------------------------------------------------------------------------------|-------------------------------------------------------------------------------------------------------------------------------------------------------------------------------------------------------------------------------------------------------------------------------------------------------------------------------------------------------------------------------------------------------------------------------------------------------------------------|

### 3. Follow Up

- Re-test blood glucose after 15 min
  - **If 4.0 mmol/L or greater**, do not re-test. If available, offer a snack if meal not due within 1 h. **If 3.9 mmol/L or less after oral or enteral glucose or juice**, repeat the treatment and re-test in 15 min. If blood glucose remains 3.9 mmol/L or less after re-treatment, notify physician.
  - **If 3.9 mmol/L or less after IV dextrose or SC glucagon**, notify physician.
- Document the hypoglycemic episode and its treatment in the *nursing notes* and *Blood Glucose Monitoring Record* and notify MD.

### 4. Prevention

- Before next dose of diabetes medication, physician should:
  - Look for non-medication-related causes for this hypoglycemic episode.

- Review and reassess all orders for insulin or oral diabetes medication.
